# Supplementary material for: mTOR-dependent dysregulation of autophagy contributes to the retinal ganglion cell loss in streptozotocin-induced diabetic retinopathy
Source: PubMed Central journal article supplement (PMC7913405; doi:10.1186/s12964-020-00698-4), 2021-02-26
Supplement: 12964_2020_698_MOESM2_ESM.pdf [file 12964_2020_698_MOESM2_ESM.pdf]

| #  | Antibody                                        | Company                      | Cat no.     | Application | Dilution        |
|----|-------------------------------------------------|------------------------------|-------------|-------------|-----------------|
| 1  | phospho-mTOR<br>(Ser2448)                       | Abcam                        | ab109268    | WB<br>IF    | 1:1000<br>1:500 |
| 2  | mTOR                                            | Cell Signaling<br>Technology | #2983       | WB          | 1:1000          |
| 3  | phospho-S6<br>Ribosomal Protein<br>(Ser240/244) | Cell Signaling<br>Technology | #5364       | WB          | 1:1000          |
| 4  | GLUT1                                           | Abcam                        | ab 40084    | WB<br>IF    | 1:1000          |
|    |                                                 |                              | ab115730    | IF          | 1:1000          |
| 5  | $\beta$ -actin                                  | Santa Cruz<br>Biotechnology  | sc-47778    | WB          | 1:1000          |
| 6  | Brn3a                                           | Millipore                    | MAB1585     | IF          | 1:100           |
| 7  | NeuN                                            | Millipore                    | MAB377      | IF          | 1:2000          |
| 8  | Calbindin                                       | Sigma Aldrich,<br>Inc.       | C9848       | IF          | 1:100           |
| 9  | Glutamine<br>synthetase                         | Millipore                    | MAB302      | IF          | 1:1000          |
| 10 | Cleaved caspase 3                               | Cell Signaling<br>Technology | CST9661     | IF          | 1:400           |
| 11 | Beclin1                                         | Novus<br>Biologicals         | NB-500-249  | IF          | 1:1000          |
| 12 | GFAP                                            | Abcam                        | ab53544     | IF          | 1:300           |
| 13 | ATG9A                                           | Novus<br>Biologicals         | NB110-56893 | IF          | 1:1000          |

**Supplemental Table S1. Details on antibodies**

## Homo sapiens

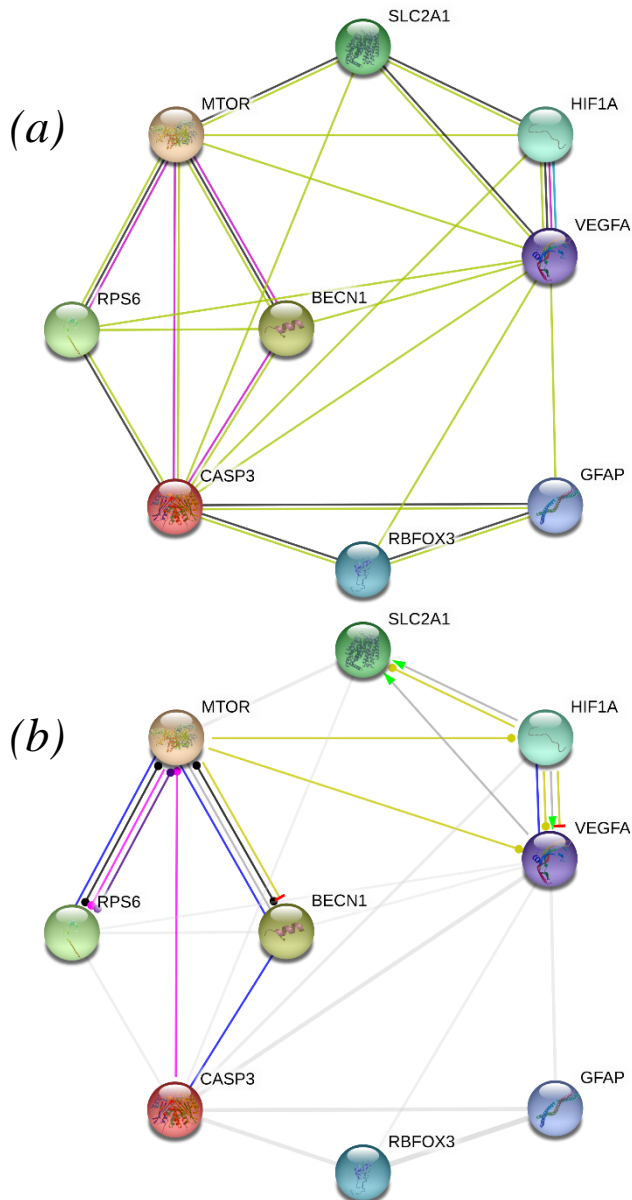

## Mus musculus

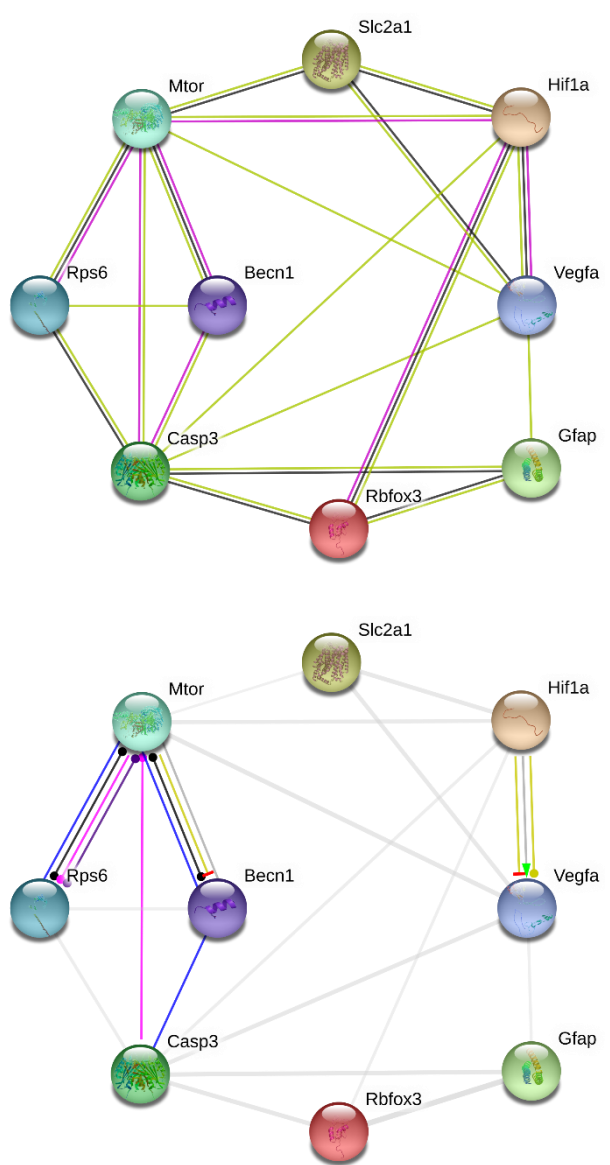

### Supplemental Figure S1. The potential interactions among selected proteins.

Network nodes represent proteins (Slc2a1 (GLUT1), Mtor, Rps6, Becn1, Hif1a, Vegfa, GFAP, Casp3, RBFOX3 (NeuN)) of Homo sapiens and Mus musculus. *Splice isoforms or post-translational modifications are collapsed, i.e. each node represents all the proteins produced by a single, protein-coding gene locus.*

#### Legends:

Node Color: *colored nodes: query proteins and first shell of interactors; white nodes: second shell of interactors*

Node Content: *empty nodes: proteins of unknown 3D structure; filled nodes: some 3D structure is known or predicted*

Edges represent protein protein associations. Meaning of network edges: evidence – (a) and molecular action (b)

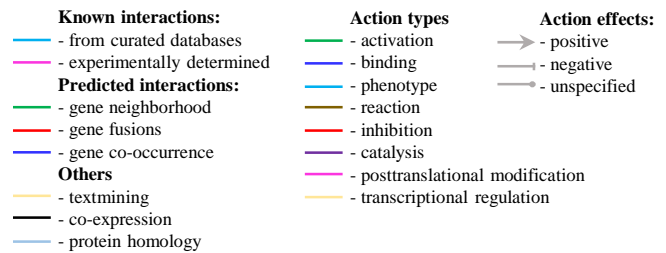

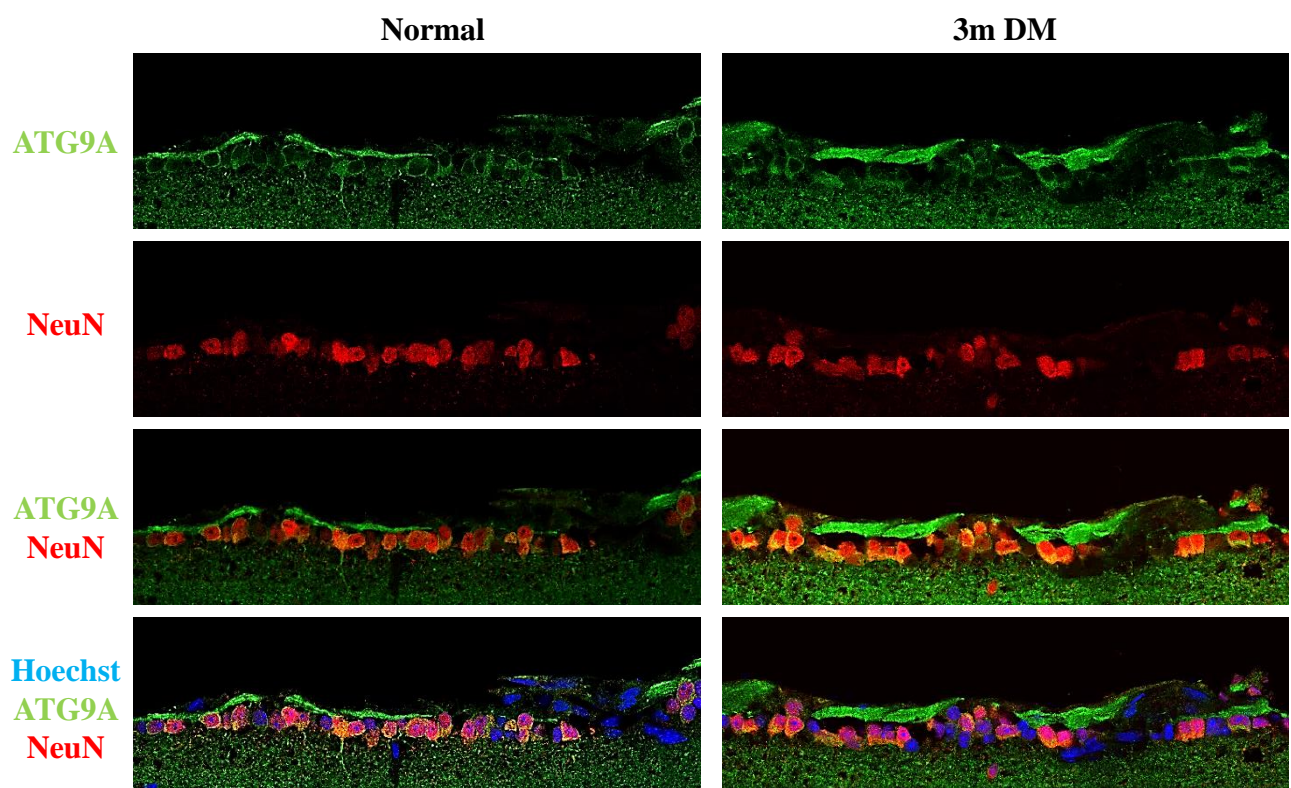

**Supplemental Figure S2. Autophagy activation in retinal ganglion cells.**

Immuno-co-staining for ATG9A (green) and *NeuN* (red) of normal and 3 m DM mouse retina.
